# Supplementary material for: Pargyline-phosphine copper(i) clusters with tunable emission for light-emitting devices
Source: Royal Society of Chemistry journal article supplement (doi:10.1039/d4dt00022f), 2024-01-01
Supplement: d4dt00022f1.pdf [file d4dt00022f1.pdf]

Electronic Supplementary Material (ESI) for Dalton Transactions.  
This journal is © The Royal Society of Chemistry 2018

## **Pargyline-phosphine Copper(I) Clusters with Tunable Emission for Light-Emitting Devices**

*Qiu-Qin Huang,<sup>a</sup> Yan-Yan Lin,<sup>a</sup> Yu-Ling Wang,<sup>a</sup> Jia yuan Qi,<sup>a</sup> FengFu Fu,<sup>a</sup> Qiao-Hua Wei<sup>\*a,b</sup>*

<sup>a</sup> MOE Key Laboratory for Analytical Science of Food Safety and Biology, Fujian Provincial Key Laboratory of Analysis and Detection Technology for Food Safety, Fujian Provincial Key Laboratory of Electrochemical Energy Storage Materials, College of Chemistry, Fuzhou University, Fuzhou, Fujian 350108, China.

<sup>b</sup> State Key Laboratory of Structural Chemistry, Fujian Institute of Research on the Structure of Matter and Graduate School of CAS, Fuzhou, Fujian 350002, China.

E-mail: [qhw76@fzu.edu.cn](mailto:qhw76@fzu.edu.cn).

## Table of Contents

| <b>content</b>                                   | <b>page</b> |
|--------------------------------------------------|-------------|
| Cover page                                       | 1           |
| Table of Contents                                | 2           |
| Characterizations (Fig. S1-S5)                   | 3-7         |
| Crystal Structural Determination                 | 8           |
| Crystal Structures (Table S1-S3, Fig. S6-S7)     | 9-13        |
| Photophysical Properties (Table S4, Fig. S8-S15) | 14-21       |
| References                                       | 22          |

# Characterizations

## Additional IR Analysis

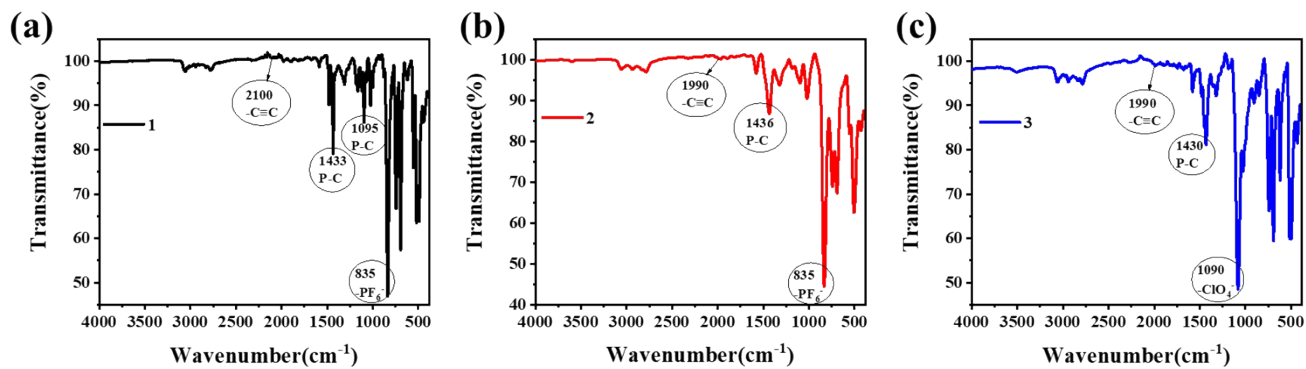

Fig. S1 FTIR spectra of (a) 1, (b) 2, and (c) 3.

# Characterizations

## <sup>1</sup>H NMR Analysis

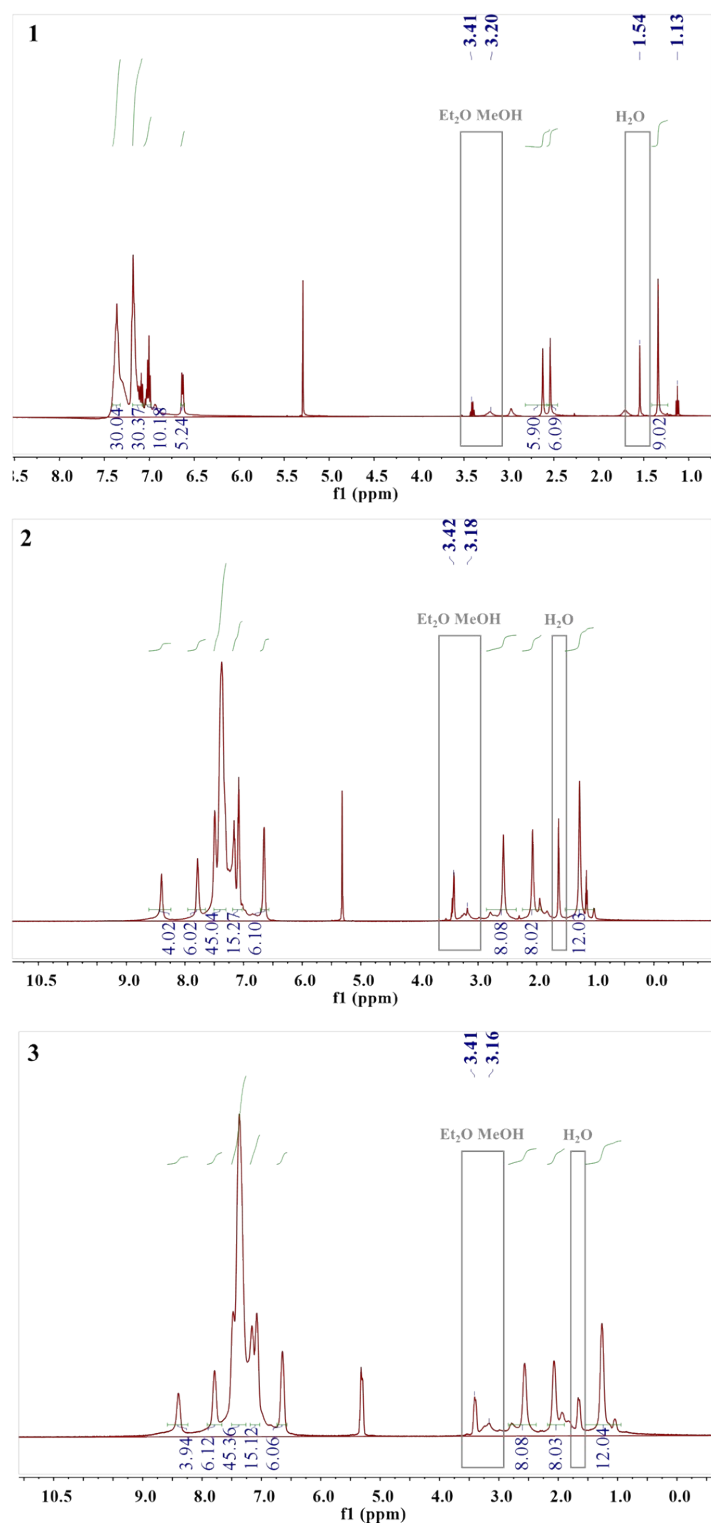

Fig. S2 <sup>1</sup>H NMR spectra of 1, 2 and 3.

## Characterizations

### $^{31}\text{P}\{^1\text{H}\}$ NMR Analysis

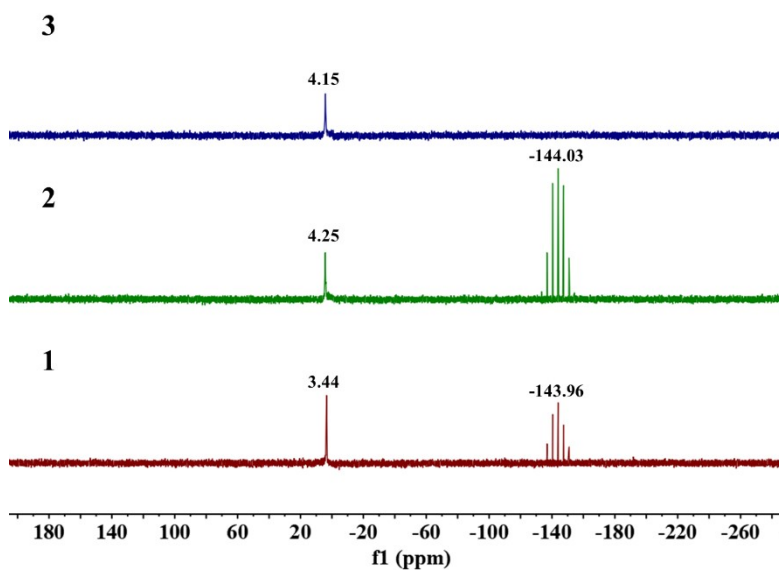

Fig. S3  $^{31}\text{P}\{^1\text{H}\}$  NMR spectra of 1, 2 and 3.

# Characterizations

## XPS Analysis

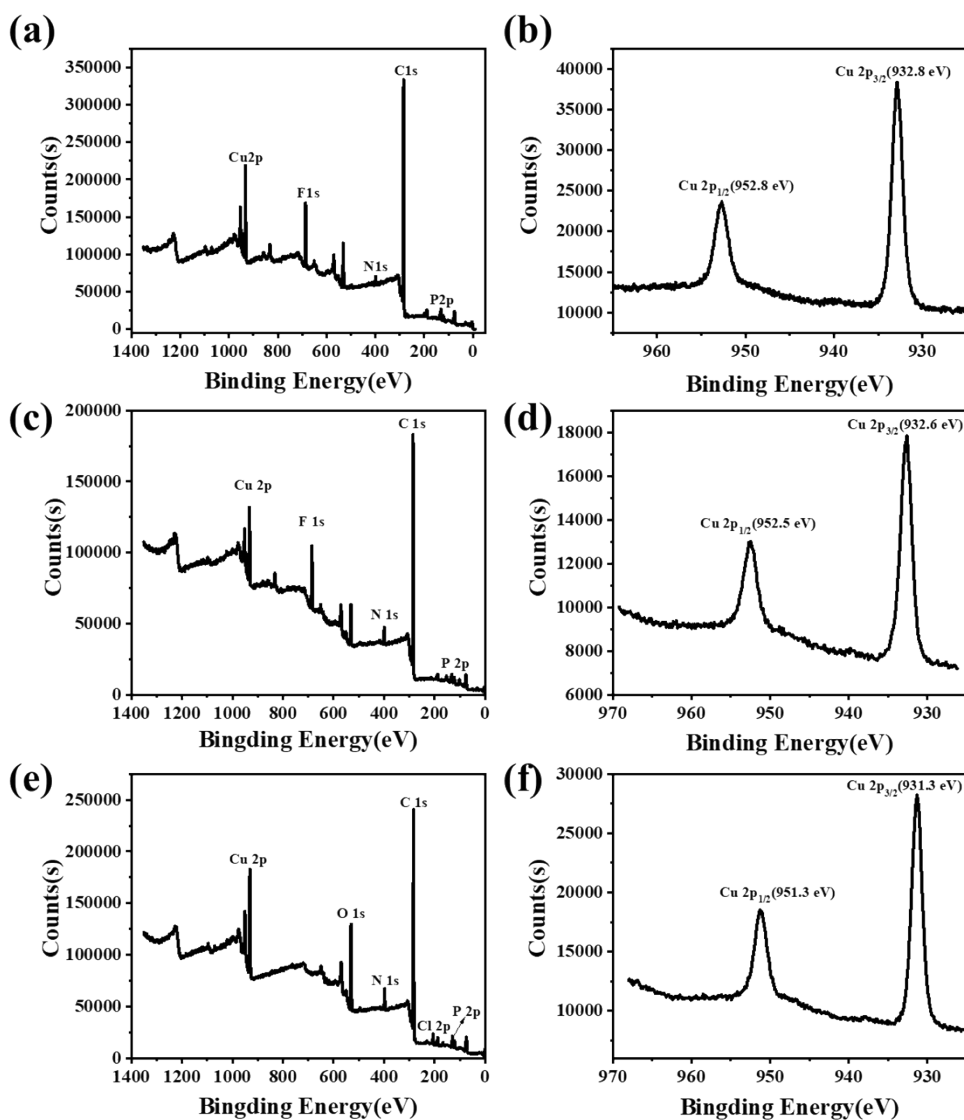

Fig. S4 XPS full-scan spectra of (a) 1, (c) 2, (e) 3 and Cu 2p spectra of (b) 1, (d) 2, (f) 3.

## Characterizations

### TG Analysis

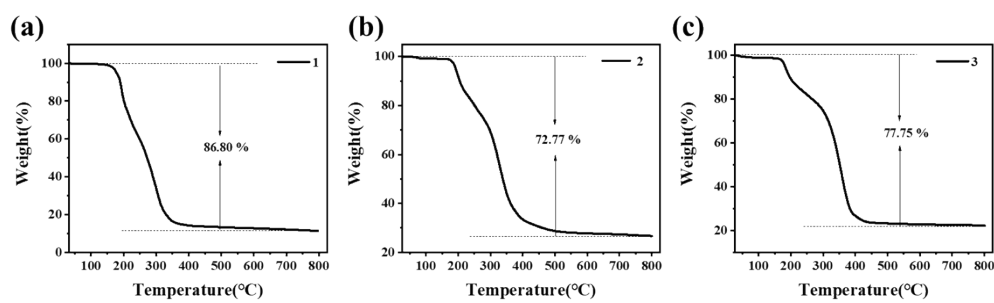

Fig. S5 Thermo gravimetric curves of (a) 1, (b) 2 and (c) 3.

---

## Crystal Structural Determination

The crystals **1**, **2** and **3** coated with epoxy resin was measured on D8 Venture under a cold nitrogen stream. The structure was solved by direct methods using the *SHELXS97* program and was refined by full matrix least-squares on  $F^2$  using the program *SHELXL97*<sup>1</sup>. The positions of the nonhydrogen atoms were refined with anisotropic displacement factors. The crystallographic parameters and details for data collections and refinements are summarized in Table S1, and the selected bond lengths and angles are listed in Tables S2-S3. Full crystallographic data are also provided there as CIF files.



## Crystal Structure

**Table S1.** Crystallographic data for clusters **1**, **2·1/2CH<sub>2</sub>Cl<sub>2</sub>** and **3·CH<sub>2</sub>Cl<sub>2</sub>**.

| Cluster                                   | <b>1</b>                                                                                      | <b>2·1/2CH<sub>2</sub>Cl<sub>2</sub></b>                                                            | <b>3·CH<sub>2</sub>Cl<sub>2</sub></b>                                                                          |
|-------------------------------------------|-----------------------------------------------------------------------------------------------|-----------------------------------------------------------------------------------------------------|----------------------------------------------------------------------------------------------------------------|
| Empirical formula                         | C <sub>105</sub> H <sub>96</sub> Cu <sub>4</sub> F <sub>6</sub> N <sub>3</sub> P <sub>5</sub> | C <sub>112.5</sub> H <sub>105</sub> ClCu <sub>6</sub> F <sub>12</sub> N <sub>8</sub> P <sub>6</sub> | C <sub>113</sub> H <sub>106</sub> Cl <sub>4</sub> Cu <sub>6</sub> N <sub>8</sub> O <sub>8</sub> P <sub>4</sub> |
| Formula weight                            | 1922.85                                                                                       | 2399.55                                                                                             | 2350.97                                                                                                        |
| Temperature(K)                            | 296.15                                                                                        | 100.15                                                                                              | 296.15                                                                                                         |
| Wavelength (Å)                            | 0.71073                                                                                       | 0.71073                                                                                             | 0.71073                                                                                                        |
| Crystal system                            | Monoclinic                                                                                    | Triclinic                                                                                           | Triclinic                                                                                                      |
| space group                               | <i>P</i> 21/ <i>c</i>                                                                         | <i>P</i> -1                                                                                         | <i>P</i> -1                                                                                                    |
| <i>a</i> (Å)                              | 14.6739(10)                                                                                   | 14.51350(10)                                                                                        | 14.4931(11)                                                                                                    |
| <i>b</i> (Å)                              | 21.6181(12)                                                                                   | 14.80280(10)                                                                                        | 14.8552(10)                                                                                                    |
| <i>c</i> (Å)                              | 29.0977(16)                                                                                   | 26.8559(2)                                                                                          | 26.891(2)                                                                                                      |
| $\alpha$ (°)                              | 90                                                                                            | 74.6580(10)                                                                                         | 75.823(3)                                                                                                      |
| $\beta$ (°)                               | 91.273(2)                                                                                     | 78.7900(10)                                                                                         | 79.117(3)                                                                                                      |
| $\gamma$ (°)                              | 90                                                                                            | 72.0250(10)                                                                                         | 69.750(4)                                                                                                      |
| Volume (Å <sup>3</sup> )                  | 9228.1(10)                                                                                    | 5252.41(8)                                                                                          | 5231.7(7)                                                                                                      |
| Z                                         | 4                                                                                             | 2                                                                                                   | 2                                                                                                              |
| $\rho_{\text{calcd}}$ , g/cm <sup>3</sup> | 1.384                                                                                         | 1.517                                                                                               | 1.492                                                                                                          |
| $\mu$ , mm <sup>-1</sup>                  | 1.058                                                                                         | 1.384                                                                                               | 1.423                                                                                                          |
| F(000)                                    | 3968.0                                                                                        | 2450.0                                                                                              | 2412.0                                                                                                         |
| 2 $\theta$ (°)                            | 3.9 to 50.108                                                                                 | 3.482 to 55                                                                                         | 3.888 to 50.262                                                                                                |
| Limiting indices                          | -17 $\leq$ h $\leq$ 17,<br>-25 $\leq$ k $\leq$ 25,<br>-34 $\leq$ l $\leq$ 34                  | -18 $\leq$ h $\leq$ 18,<br>-19 $\leq$ k $\leq$ 19,<br>-34 $\leq$ l $\leq$ 34                        | -17 $\leq$ h $\leq$ 17,<br>-17 $\leq$ k $\leq$ 17,<br>-32 $\leq$ l $\leq$ 32                                   |
| Reflections collected/unique              | 198701 / 16338                                                                                | 113448 / 24051                                                                                      | 187095 / 18642                                                                                                 |
| R (int)                                   | 0.0449                                                                                        | 0.0402                                                                                              | 0.0588                                                                                                         |
| Goodness-of-fit on F <sup>2</sup>         | 1.029                                                                                         | 1.055                                                                                               | 1.048                                                                                                          |
| R1 (F <sub>o</sub> )                      | 0.0642                                                                                        | 0.0563                                                                                              | 0.0571                                                                                                         |
| wR2(F <sub>o</sub> <sup>2</sup> )         | 0.1783                                                                                        | 0.1551                                                                                              | 0.1217                                                                                                         |
| Largest diff. peak and hole               | 2.10 / -0.70                                                                                  | 1.66 / -1.25                                                                                        | 1.72/-2.42                                                                                                     |

## Crystal Structure

**Table S2.** Bond lengths and bond angles for **1**.

| <b>1</b>                 |                                              |                                                |                                               |  |
|--------------------------|----------------------------------------------|------------------------------------------------|-----------------------------------------------|--|
| <b>Bond distance [Å]</b> |                                              |                                                |                                               |  |
| Cu-Cu                    | Cu1-Cu2 2.4908(7)                            | Cu1-Cu3 2.5121(8)                              | Cu4-Cu1 2.4860(7)                             |  |
| Cu-P                     | Cu1-P1 2.2247(13)<br>Cu2-P2 2.2441(12)       | Cu3-P3 2.2400(15)                              | Cu4-P4 2.2301(13)                             |  |
| Cu-C <sub>σ</sub>        | Cu1-C1 2.165(5)<br>Cu2-C1 1.983(5)           | Cu1-C21 2.129(4)<br>Cu4-C21 2.015(4)           | Cu1-C11 2.109(5)<br>Cu3-C11 2.012(5)          |  |
| Cu-C <sub>π</sub>        | Cu2-C21 2.131(4)<br>Cu2-C22 2.118(4)         | Cu3-C1 2.149(5)<br>Cu3-C2 2.154(11)            | Cu4-C11 2.108(5)<br>Cu4-C12 2.231(5)          |  |
| <b>Bond angles [°]</b>   |                                              |                                                |                                               |  |
| P-Cu-Cu1                 | P2-Cu2-Cu1 166.71(4)                         | P3-Cu3-Cu1 159.67(5)                           | P4-Cu4-Cu1 169.80(4)                          |  |
| P1-Cu1-Cu                | P1-Cu1-Cu2 116.91(4)                         | P1-Cu1-Cu3 134.26(4)                           | P1-Cu1-Cu4 124.84(4)                          |  |
| Cu1-C-Cu                 | Cu1-C1-Cu2 73.67(15)<br>Cu1-C1-Cu3 71.24(14) | Cu1-C11-Cu3 75.08(16)<br>Cu1-C11-Cu4 72.25(14) | Cu1-C21-Cu2 71.56(2)<br>Cu1-C21-Cu4 73.68(14) |  |

## Crystal Structure

**Table S3.** Bond lengths and bond angles for  $2 \cdot 1/2\text{CH}_2\text{Cl}_2$  and  $3 \cdot \text{CH}_2\text{Cl}_2$ .

|                        | $2 \cdot 1/2\text{CH}_2\text{Cl}_2$ |             | $3 \cdot \text{CH}_2\text{Cl}_2$ |            |
|------------------------|-------------------------------------|-------------|----------------------------------|------------|
| Cu-Cu                  | Cu1-Cu3                             | 2.777(6)    | Cu2-Cu6                          | 2.6738(6)  |
|                        | Cu1-Cu4                             | 2.5795(6)   | Cu3-Cu5                          | 2.630(6)   |
|                        | Cu2-Cu3                             | 2.845(13)   | Cu4-Cu5                          | 2.4653(6)  |
|                        | Cu2-Cu4                             | 2.5233(6)   | Cu5-Cu6                          | 2.5818(6)  |
|                        | Cu2-Cu5                             | 2.7397(6)   |                                  |            |
| Cu-P                   | Cu2-P3                              | 2.2132(10)  | Cu4-P2                           | 2.2020(10) |
|                        | Cu3-P1                              | 2.249(4)    | Cu5-P4                           | 2.2341(9)  |
| Cu-N                   | Cu1-N1                              | 2.127(3)    | Cu6-N3                           | 2.021(3)   |
|                        | Cu1-N2                              | 2.115(3)    | Cu6-N4                           | 2.137(3)   |
| Cu-C $_{\sigma}$       | Cu2-C1                              | 2.089(3)    | Cu4-C23                          | 2.162(4)   |
|                        | Cu2-C12                             | 2.380(3)    | Cu4-C34                          | 2.016(3)   |
|                        | Cu2-C34                             | 2.134(3)    | Cu5-C12                          | 2.125(3)   |
|                        | Cu3-C1                              | 2.468(16)   | Cu5-C23                          | 2.038(4)   |
|                        | Cu3-C23                             | 2.370(8)    | Cu5-C34                          | 2.303(3)   |
|                        | Cu4-C1                              | 2.381(3)    | Cu6-C12                          | 1.996(3)   |
| Cu-C $_{\pi}$          | Cu1-C1                              | 2.183(3)    | Cu1-C24                          | 2.385(4)   |
|                        | Cu1-C2                              | 2.378(6)    | Cu3-C12                          | 2.098(5)   |
|                        | Cu1-C23                             | 2.330(4)    | Cu3-C13                          | 2.085(6)   |
| <b>Bond angles [°]</b> |                                     |             |                                  |            |
| P-Cu-C                 | P3-Cu2-C12                          | 104.50(8)   | P3-Cu2-C1                        | 118.60(14) |
|                        | P3-Cu2-C34                          | 111.72(9)   | P3-Cu2-C12                       | 111.26(12) |
|                        | P3-Cu2-C1                           | 124.63(9)   | P3-Cu2-C34                       | 108.35(13) |
|                        | P1-Cu3-C13                          | 108.1(2)    | P1-Cu3-C12                       | 129.25(16) |
|                        | P1-Cu3-C12                          | 142.2(2)    | P1-Cu3-C23                       | 113.77(15) |
|                        | P1-Cu3-C1                           | 100.1(5)    | P1-Cu3-C13                       | 99.54(15)  |
|                        | P1-Cu3-C23                          | 114.2(3)    | P1-Cu3A-C1                       | 113.83(15) |
|                        | P2-Cu4-C1                           | 111.40(9)   | P2-Cu4-C23                       | 112.34(18) |
|                        | P2-Cu4-C23                          | 114.39(10)  | P2-Cu4-C34                       | 109.46(15) |
|                        | P2-Cu4-C34                          | 120.00(10)  | P2-Cu4-C1                        | 112.5(2)   |
|                        | P4-Cu5-C23                          | 119.94(10)  | P4-Cu5-C12                       | 103.31(11) |
|                        | P4-Cu5-C12                          | 110.53(9)   | P4-Cu5-C34                       | 112.61(12) |
|                        | P4-Cu5-C34                          | 108.60(9)   | P4-Cu5-C23                       | 127.28(12) |
| C-Cu-C                 | C1-Cu1-C23                          | 90.49(12)   | C1-Cu1-C23                       | 90.33(16)  |
|                        | C1-Cu1-C24                          | 118.79(12)  | C2-Cu1-C23                       | 117.45(16) |
|                        | C2-Cu1-C23                          | 118.13(18)  | C1-Cu1-C24                       | 115.4(2)   |
|                        | C2-Cu1-C24                          | 147.86(18)  | C2-Cu1-C24                       | 143.8(2)   |
|                        | C1-Cu2-C12                          | 103.65(12)  | C1-Cu2-C12                       | 110.37(19) |
|                        | C1-Cu2-C34                          | 111.05(13)  | C1-Cu2-C34                       | 107.5(2)   |
|                        | C12-Cu2-C34                         | 96.74(12)   | C12-Cu2-C34                      | 98.77(17)  |
|                        | C1-Cu3-C23                          | 83.0(3)     | C12-Cu3-C23                      | 115.68(19) |
|                        | C1-Cu3-C13                          | 120.0(6)    | C13-Cu3-C23                      | 137.87(19) |
|                        | C1-Cu3-C12                          | 100.5(5)    | C1-Cu3A-C23                      | 82.84(18)  |
|                        | C13-Cu3-C23                         | 126.8(5)    | C1-Cu3A-C12                      | 134.48(17) |
|                        | C12-Cu3-C23                         | 99.6(3)     | C1-Cu3A-C13                      | 124.2(2)   |
|                        | C1-Cu4-C23                          | 89.64(12)   | C1-Cu4-C23                       | 100.9(2)   |
|                        | C1-Cu4-C34                          | 104.37(13)  | C1-Cu4-C34                       | 112.3(2)   |
|                        | C23-Cu4-C34                         | 112.26(14)  | C23-Cu4-C34                      | 109.1(2)   |
|                        | C12-Cu5-C23                         | 110.33(13)  | C12-Cu5-C23                      | 103.82(15) |
| C23-Cu5-C34            | 105.98(14)                          | C23-Cu5-C34 | 109.70(16)                       |            |
| C12-Cu5-C34            | 99.34(12)                           | C34-Cu5-C12 | 93.75(16)                        |            |
| N-Cu-N                 | N1-Cu1-N2                           | 100.70(11)  | N1-Cu1-N2                        | 101.13(14) |
|                        | N3-Cu6-N4                           | 107.39(12)  | N4-Cu6-N3                        | 105.73(14) |
| C-Cu-N                 | C12-Cu6-N3                          | 139.61(13)  | C12-Cu6-N3                       | 103.27(16) |
|                        | C12-Cu6-N4                          | 103.24(12)  | C12-Cu6-N4                       | 139.30(16) |

## Crystal Structure

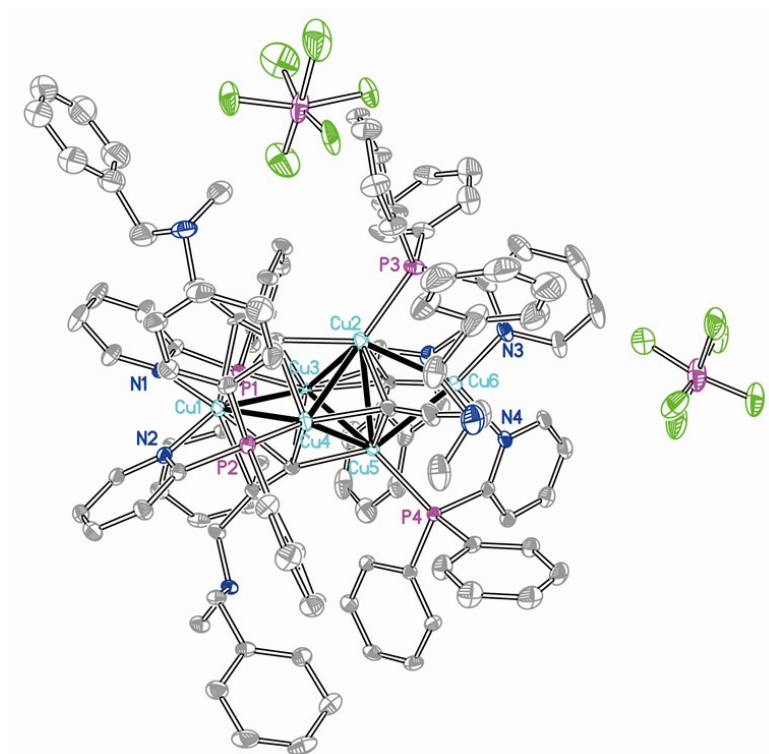

**Fig. S6** ORTEP drawing of **2** with atom labelling scheme. (Color labels: turquoise, Cu; purple, P; blue, N; grey, C; green, F. The hydrogen atoms are omitted for clarity.)

## Crystal Structure XRD Analysis

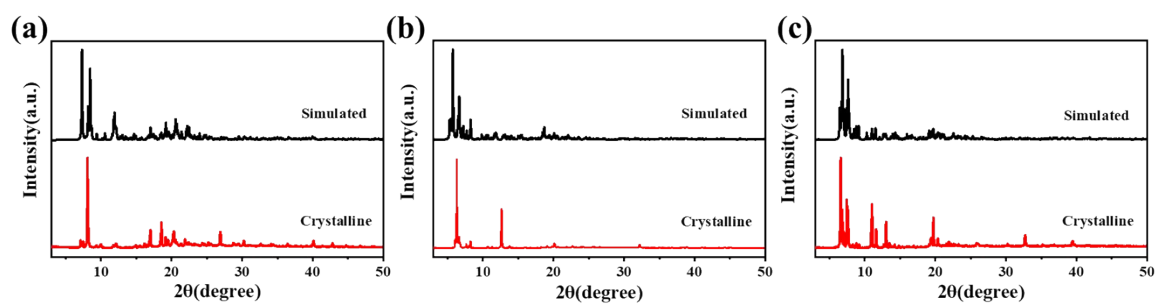

**Fig. S7** Simulated (black) and experimental (red) powder X-ray diffraction patterns of (a) **1**, (b) **2** and (c) **3**.

## Photophysical Properties

**Table S4:** Photophysical data of **1**, **2** and **3** in different solvents and solid states.

| NCs      | medium                          | $\lambda_{\text{abs}} / \text{nm}$<br>( $\epsilon \times 10^4 / \text{dm}^3 \cdot \text{mol}^{-1} \cdot \text{cm}^{-1}$ ) | $\lambda_{\text{em}} / \text{nm}$<br>( $\tau_{\text{em}} / \mu\text{s}$ )<br>(298 K) | $\lambda_{\text{em}} / \text{nm}$<br>( $\tau_{\text{em}} / \mu\text{s}$ )<br>(80 K) | $\Phi / \%$<br>(298 K) |
|----------|---------------------------------|---------------------------------------------------------------------------------------------------------------------------|--------------------------------------------------------------------------------------|-------------------------------------------------------------------------------------|------------------------|
| <b>1</b> | Solid                           |                                                                                                                           | 636 (23.43)                                                                          | 573<br>(41.00)                                                                      | 88.5                   |
|          | CH <sub>2</sub> Cl <sub>2</sub> | 239 (4.11), 280 (3.36)                                                                                                    | 464, 614                                                                             |                                                                                     |                        |
|          | DMF                             | 226 (0.53), 277 (2.83)                                                                                                    | 438, 585                                                                             |                                                                                     |                        |
|          | DMSO                            | 226 (0.53), 274 (2.68)                                                                                                    | 460, 578                                                                             |                                                                                     |                        |
|          | MeCN                            | 229 (5.82), 258 (4.77), 284 (3.28)                                                                                        | 437, 632                                                                             |                                                                                     |                        |
| <b>2</b> | Solid                           |                                                                                                                           | 611(6.68)                                                                            | 615<br>(29.21)                                                                      | 22.0                   |
|          | CH <sub>2</sub> Cl <sub>2</sub> | 238 (5.18), 280(3.38), 320 (2.02)                                                                                         | 612                                                                                  |                                                                                     |                        |
|          | DMF                             | 219 (0.68), 275 (2.41), 325 (1.08)                                                                                        | 456, 615                                                                             |                                                                                     |                        |
|          | DMSO                            | 221 (0.78), 272 (3.00), 320 (1.56)                                                                                        | 617                                                                                  |                                                                                     |                        |
|          | MeCN                            | 222 (9.65), 258 (2.58), 298 (1.24)                                                                                        | 452, 613                                                                             |                                                                                     |                        |
| <b>3</b> | Solid                           |                                                                                                                           | 590 (6.41)                                                                           | 605<br>(27.09)                                                                      | 40.2                   |
|          | CH <sub>2</sub> Cl <sub>2</sub> | 238 (4.87), 280 (3.34), 325 (2.26)                                                                                        | 608                                                                                  |                                                                                     |                        |
|          | DMF                             | 218 (0.69), 275 (2.65), 318 (1.46)                                                                                        | 457, 613                                                                             |                                                                                     |                        |
|          | DMSO                            | 221 (0.65), 271 (2.60), 318 (1.49)                                                                                        | 434, 615                                                                             |                                                                                     |                        |
|          | MeCN                            | 229 (9.77), 285 (3.15), 300 (2.46)                                                                                        | 455, 612                                                                             |                                                                                     |                        |

# Photophysical Properties

## Absorption spectra

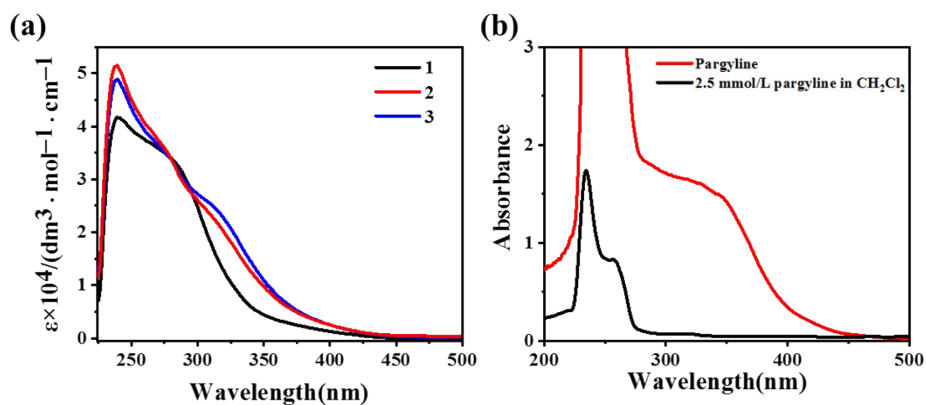

Fig. S8 Absorption spectra of (a) 1, 2 and 3 in  $\text{CH}_2\text{Cl}_2$  and (b) pargyline.

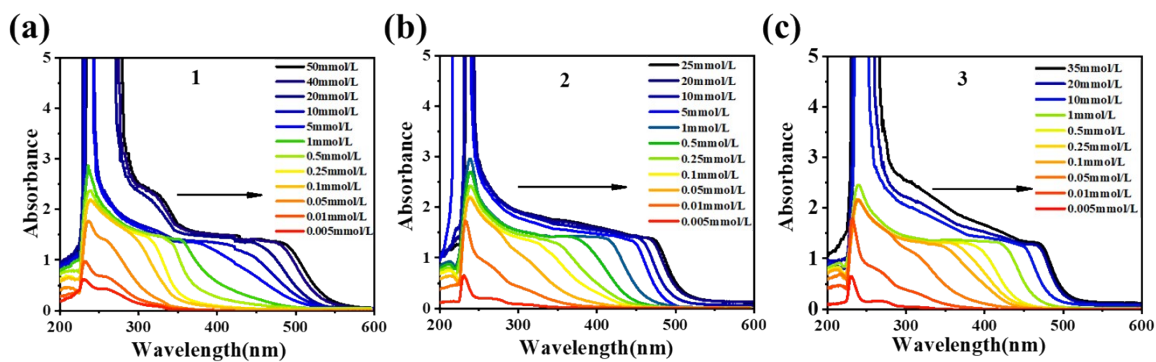

Fig. S9 Absorption spectra of (a) 1, (b) 2 and (c) 3 in  $\text{CH}_2\text{Cl}_2$  with the different concentration.

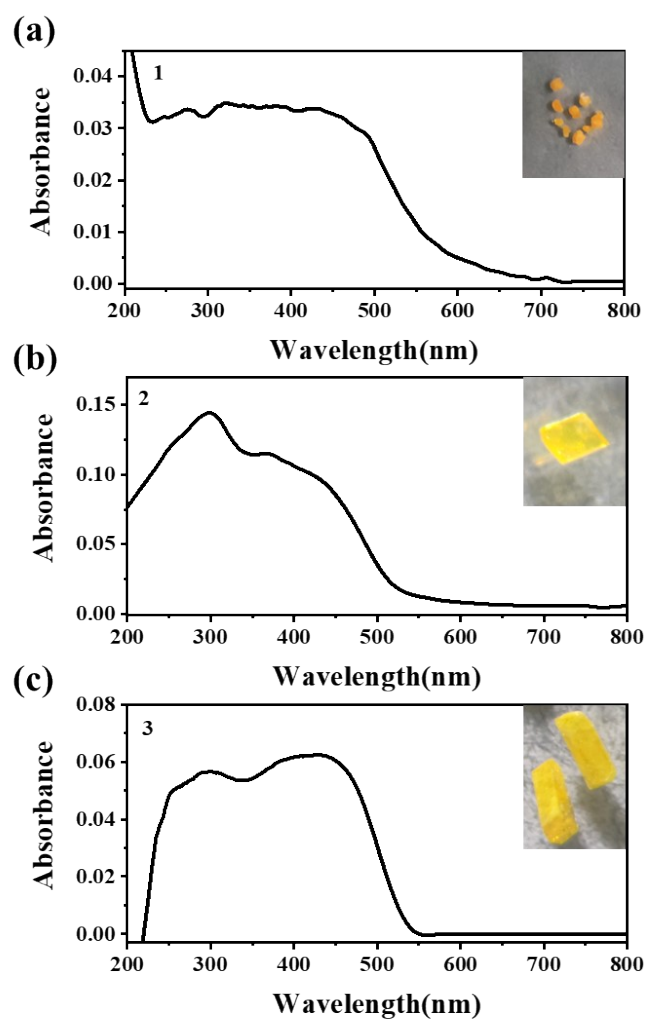

**Fig. S10** Solid-state UV-vis diffuse reflectance spectroscopies of (a) 1, (b) 2 and (c) 3.



# Photophysical Properties

## Emission spectra

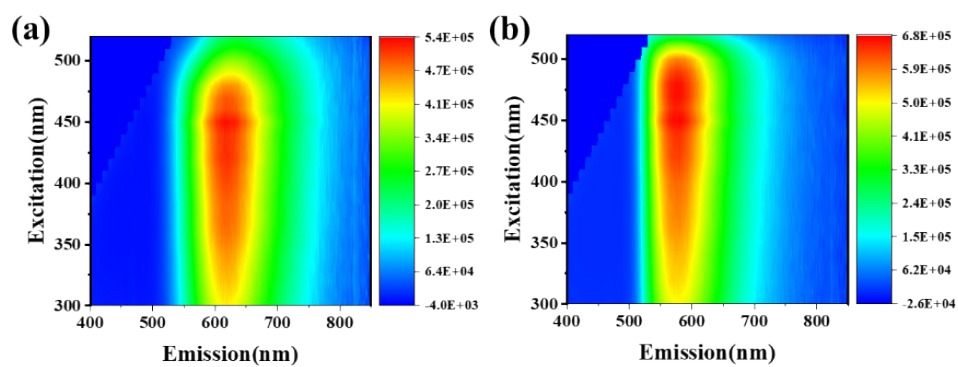

Fig. S11 Contour plots of the excitation-dependent emission spectra of (a) **2** and (b) **3**.

## Photophysical Properties

### Excitation and emission spectra

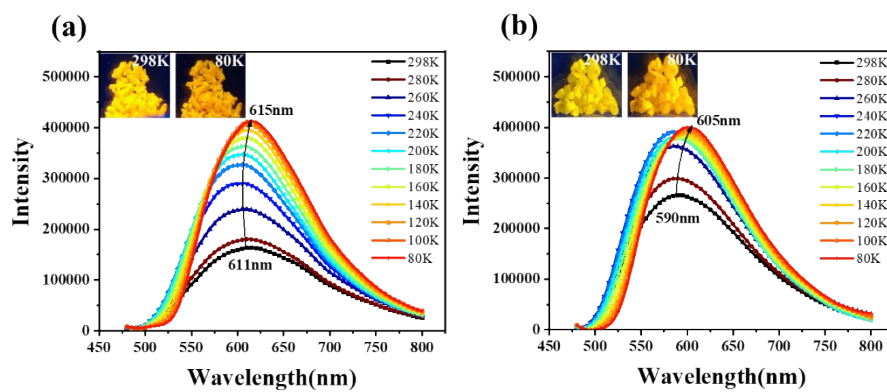

Fig. S12 Temperature-dependence of the emission spectra of (a) **2** and (b) **3** ( $\lambda_{\text{ex}}=470$  nm) in solid state.

# Photophysical Properties

## Time-resolved fluorescence spectra

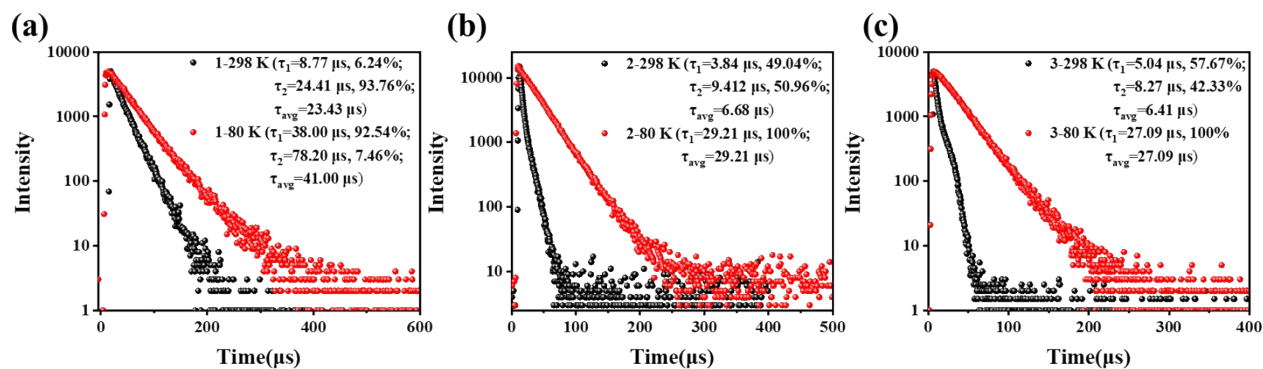

**Fig. S13** Time-resolved fluorescence spectra of (a) **1**, (b) **2** and (c) **3** at 298 K (black) and 80 K (red).

## Photophysical Properties

### Excitation and Emission spectra

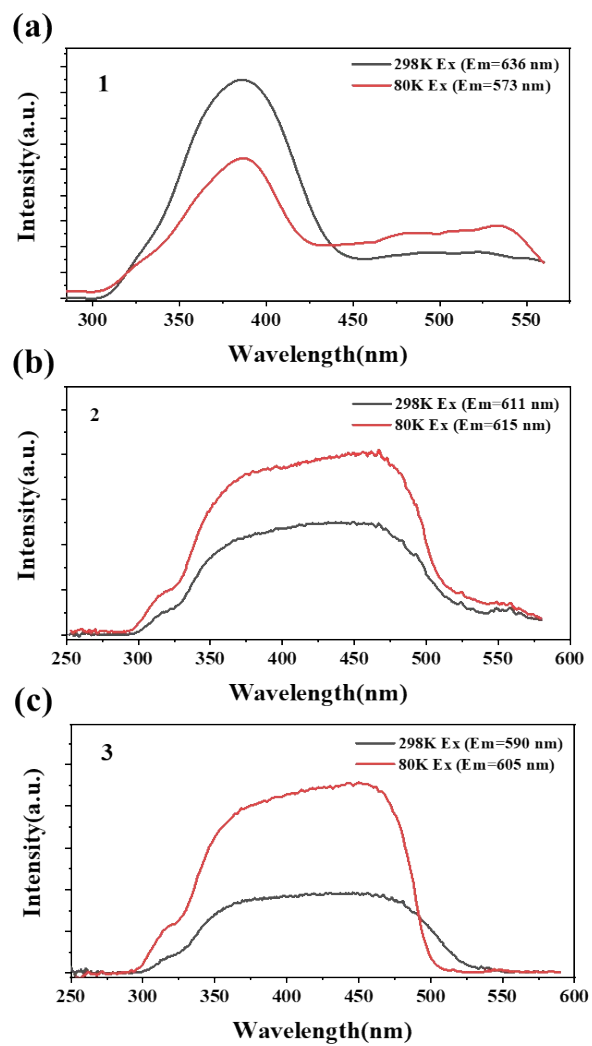

Fig. S14 Excitation spectra of (a) 1, (b) 2 and (c) 3 in the solid state at 298 and 80 K.

## Photophysical Properties

### Excitation and Emission spectra

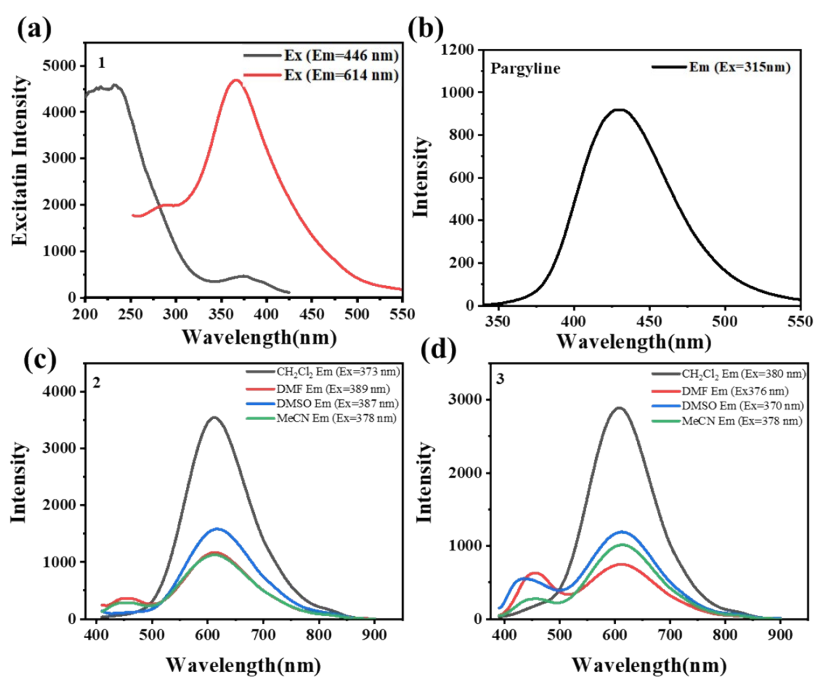

**Fig. S15** (a) Excitation spectra of **1** at  $\lambda_{em} = 446$  (black line) and 614 nm (red line), emission spectra of (b) pargyline, (c) **2** and (d) **3** in various solvents ( $c = 1$  mM).

## References

1. Sheldrick, G. M. SHELXL-97, Program for the Refinement of Crystal Structures; University of Göttingen, Göttingen, Germany, 1997.
